# Supplementary material for: Quantitative determination of the Ru(bpy)32+ cation in photochemical reactions by matrix-assisted laser desorption/ionization time-of-flight mass spectrometry
Source: Royal Society of Chemistry journal article supplement (doi:10.1039/c4ay01379d), 2014-01-01
Supplement: c4ay01379d1.pdf [file c4ay01379d1.pdf]

## Electronic Supplementary Information

### Quantitative Determination of Ru(bpy)<sub>3</sub><sup>2+</sup> Cation in Photochemical Reactions by Matrix-Assisted Laser Desorption/Ionization Time-of-Flight Mass Spectrometry

Nina Bergman,<sup>a</sup> Anders Thapper,<sup>b</sup> Stenbjörn Styring,<sup>b</sup> Jonas Bergquist,<sup>a</sup> and Denys

Shevchenko<sup>a\*</sup>

<sup>a</sup> *Analytical Chemistry, Department of Chemistry – Biomedical Centre, Uppsala University, P.O. Box 599, S-75124 Uppsala, Sweden*

<sup>b</sup> *Molecular Biomimetics, Department of Chemistry – Ångström Laboratory, Uppsala University, P.O. Box 523, S-75120 Uppsala, Sweden*

\* *email: denys.shevchenko@kemi.uu.se*

#### Table of Contents

|                                                                                                           |     |
|-----------------------------------------------------------------------------------------------------------|-----|
| Sample/quencher mixture stability test                                                                    | S-2 |
| Isotopic patterns of the Ru(bpy) <sub>3</sub> <sup>+</sup> and Ru(phen) <sub>3</sub> <sup>+</sup> signals | S-3 |
| Assay validation                                                                                          | S-3 |
| LDI mass spectra of Ru(bpy) <sub>3</sub> <sup>2+</sup> and Ru(phen) <sub>3</sub> <sup>2+</sup>            | S-5 |
| FlexAnalysis script and macro for automatic data processing                                               | S-6 |

## Sample/quencher mixture stability test

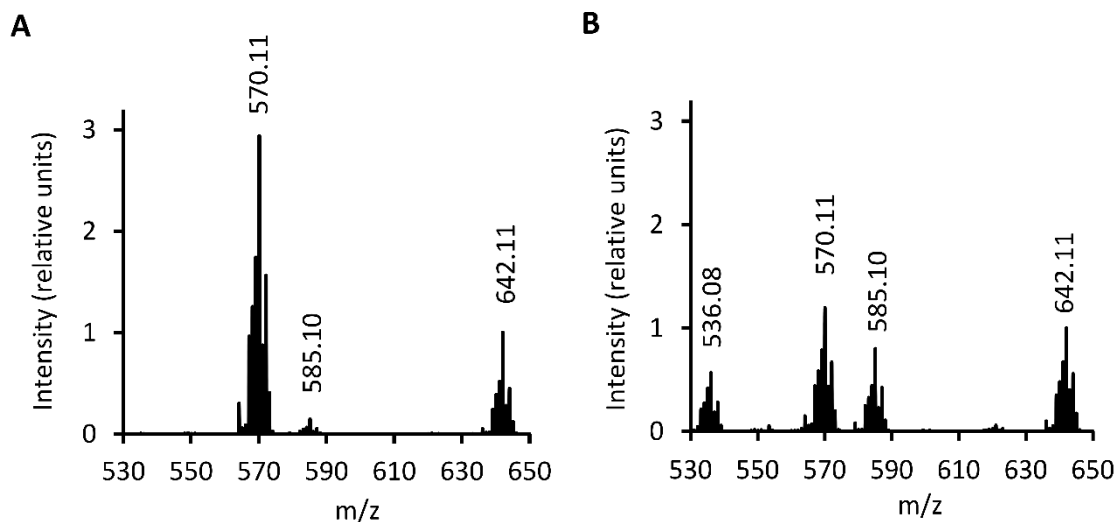

Figure S-1. MALDI spectra of the reaction mixture that was irradiated 10 minutes in the presence (A) and absence (B) of the quenching solution. Signal intensities were normalized to the peak at m/z 642.11 corresponding to the IS

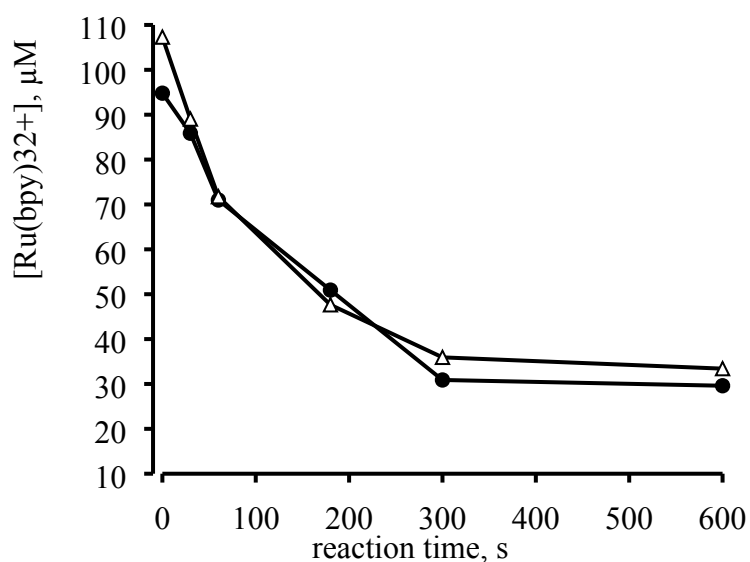

Figure S-2. Results of the MALDI MS analysis performed right after the photochemical reaction (●) and results of the MALDI MS analysis performed the next day on the same samples (Δ).

## Isotopic patterns of the Ru(bpy)<sub>3</sub><sup>+</sup> and Ru(phen)<sub>3</sub><sup>+</sup> signals

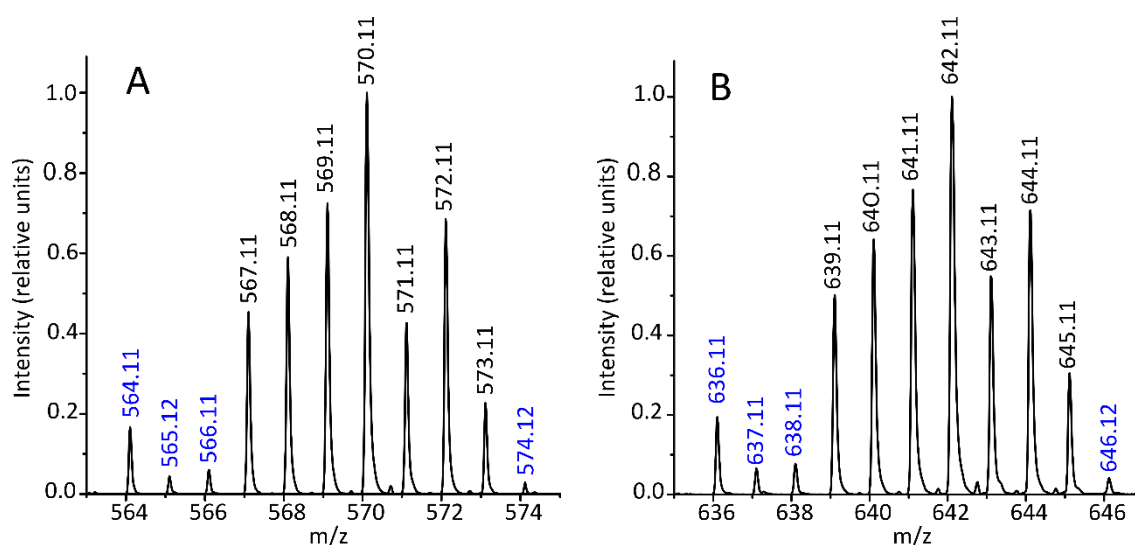

Figure S-3. Isotopic patterns of the Ru(bpy)<sub>3</sub><sup>+</sup> (A) and Ru(phen)<sub>3</sub><sup>+</sup> (B) signals. A ratio of the area under the most intensive Ru(bpy)<sub>3</sub><sup>+</sup> peak (m/z 570.11) to the area under the most intensive Ru(phen)<sub>3</sub><sup>+</sup> peak (m/z 642.11) was used as an analytical signal in this work. Additionally, within-day reproducibility, accuracy, and linearity were calculated, when a ratio of the area under the seven most intensive Ru(bpy)<sub>3</sub><sup>+</sup> peaks (m/z 567.11, 568.11, 569.11, 570.11, 571.11, 572.11, and 573.11) to the area under the seven most intensive Ru(phen)<sub>3</sub><sup>+</sup> peaks (m/z 639.11, 640.11, 641.11, 642.11, 643.11, 644.11, and 645.11) was used as an analytical signal (Table S-2). However, this “seven peaks” approach did not give any improvement and was not applied for other calculations in this work.

## Assay validation

Table S-1. Within-day reproducibility, accuracy, and linearity using S<sub>570</sub>/S<sub>642</sub> as an analytical signal.

| [Ru(bpy) <sub>3</sub> <sup>2+</sup> ]<br>(μM) | 1       |                    | 2       |                    | 3       |                    | 4       |                    | 5       |                    |
|-----------------------------------------------|---------|--------------------|---------|--------------------|---------|--------------------|---------|--------------------|---------|--------------------|
|                                               | RSD (%) | accuracy (% error) |
| 90                                            | 15.4    | 3.2                | 8.7     | 3.4                | 2.0     | 11.6               | 4.0     | 7.9                | 5.7     | 12.4               |
| 50                                            | 2.5     | 2.8                | 8.5     | 4.4                | 6.4     | 2.3                | 7.4     | 12.3               | 4.8     | 6.3                |
| 15                                            | 7.6     | 0.1                | 6.8     | 6.1                | 7.4     | 2.6                | 8.6     | 4.0                | 6.7     | 9.9                |
| R <sup>2</sup>                                | 0.990   |                    | 0.968   |                    | 0.997   |                    | 0.992   |                    | 0.972   |                    |

Table S-2. Within-day reproducibility, accuracy, and linearity using  $(S_{567} + S_{568} + S_{569} + S_{570} + S_{571} + S_{572} + S_{573}) / (S_{639} + S_{640} + S_{641} + S_{642} + S_{643} + S_{644} + S_{645})$  as an analytical signal.

| [Ru(bpy) <sub>3</sub> <sup>2+</sup> ]<br>(μM) | 1       |                    | 2       |                    | 3       |                    | 4       |                    | 5       |                    |
|-----------------------------------------------|---------|--------------------|---------|--------------------|---------|--------------------|---------|--------------------|---------|--------------------|
|                                               | RSD (%) | accuracy (% error) |
| 90                                            | 16.3    | 3.6                | 10.9    | 4.8                | 2.3     | 16.6               | 2.6     | 4.3                | 8.5     | 6.8                |
| 50                                            | 3.9     | 5.6                | 9.0     | 6.4                | 5.8     | 6.7                | 8.7     | 15.3               | 4.6     | 6.4                |
| 15                                            | 8.6     | 4.9                | 9.3     | 8.1                | 5.8     | 4.4                | 10.1    | 4.4                | 9.0     | 10.9               |
| R <sup>2</sup>                                | 0.990   |                    | 0.955   |                    | 0.993   |                    | 0.988   |                    | 0.952   |                    |

Table S-3. Between-day reproducibility, accuracy, and linearity  $S_{570}/S_{642}$  as an analytical signal.

| [Ru(bpy) <sub>3</sub> <sup>2+</sup> ]<br>(μM) | day 1   |                    | day 2   |                    | day 3   |                    | day 4   |                    | day 5   |                    |
|-----------------------------------------------|---------|--------------------|---------|--------------------|---------|--------------------|---------|--------------------|---------|--------------------|
|                                               | RSD (%) | accuracy (% error) |
| 90                                            | 7.9     | 14.5               | 5.6     | 9.0                | 15.4    | 3.2                | 6.4     | 8.7                | 3.4     | 3.3                |
| 50                                            | 12.3    | 5.1                | 4.5     | 5.9                | 2.5     | 2.8                | 5.4     | 9.7                | 1.8     | 6.7                |
| 15                                            | 9.3     | 1.4                | 5.2     | 4.6                | 7.6     | 0.1                | 6.6     | 1.7                | 4.4     | 13.7               |
| R <sup>2</sup>                                | 0.974   |                    | 0.985   |                    | 0.990   |                    | 0.970   |                    | 0.987   |                    |

LDI mass spectra of  $\text{Ru}(\text{bpy})_3^{2+}$  and  $\text{Ru}(\text{phen})_3^{2+}$

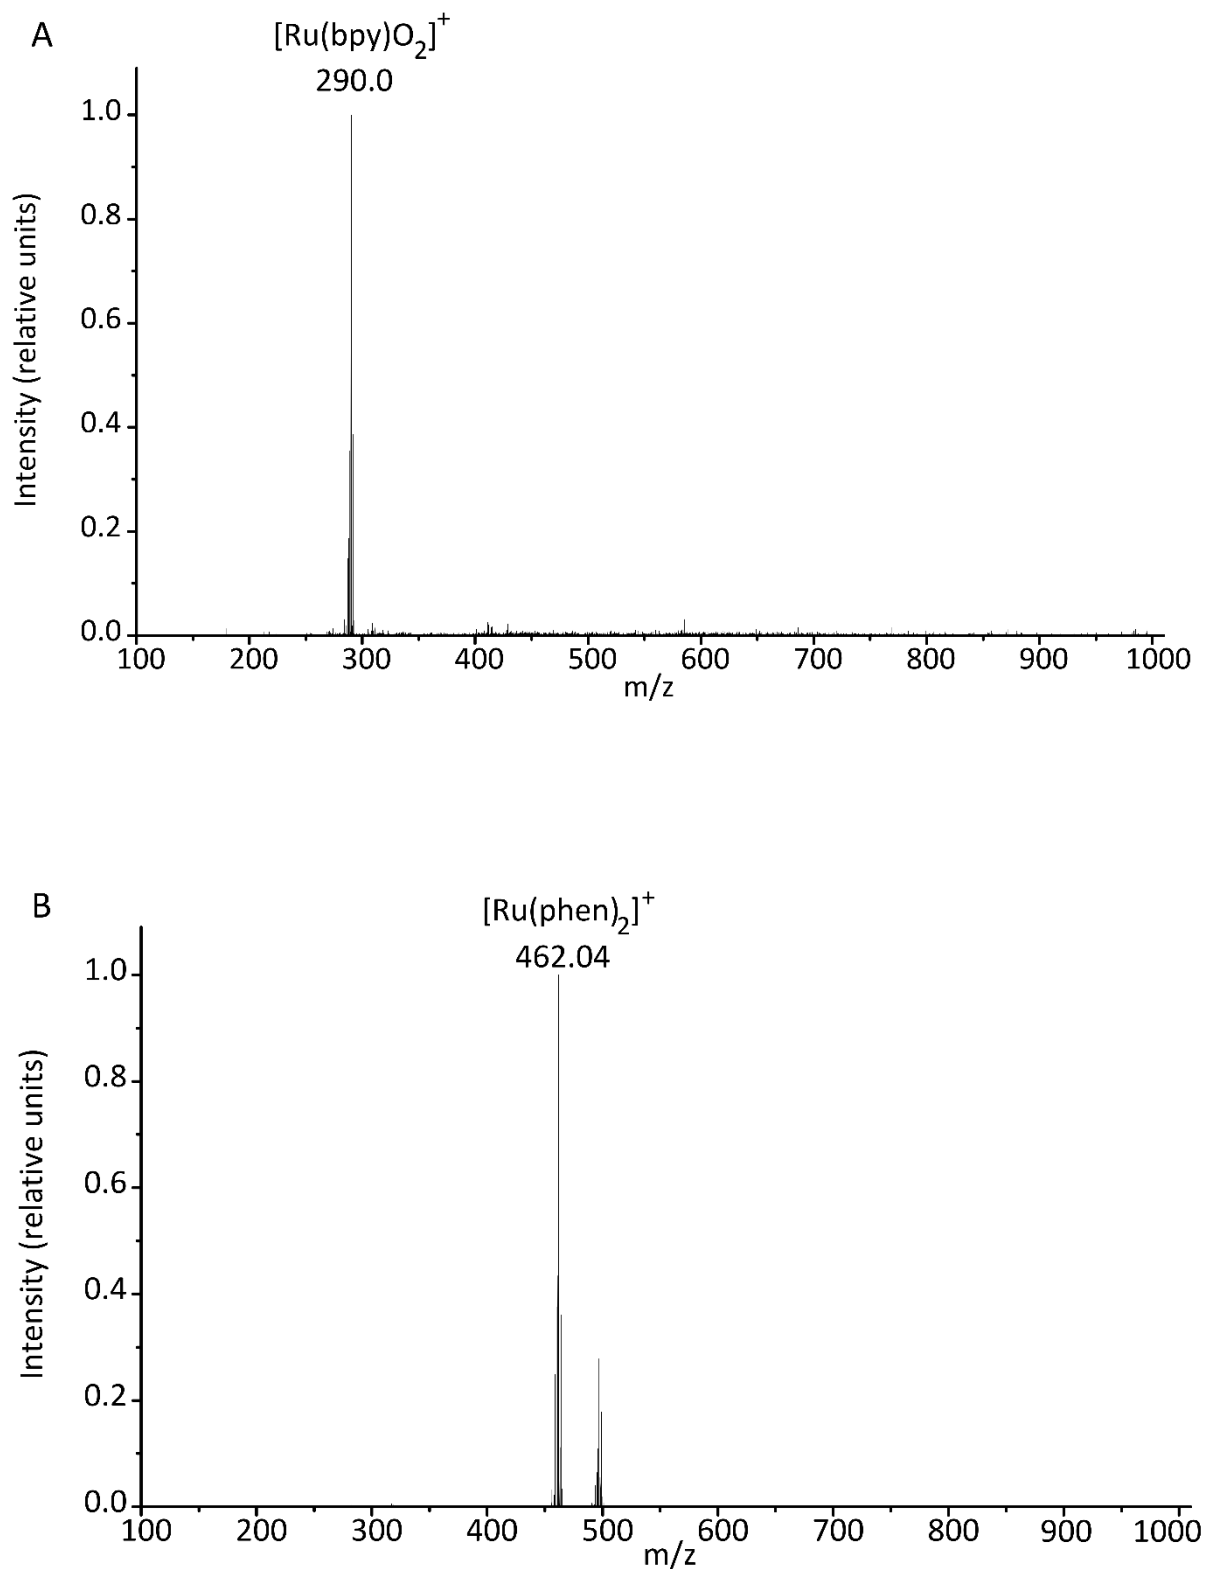

Figure S-4. LDI mass spectra of  $\text{Ru}(\text{bpy})_3^{2+}$  (**A**) and  $\text{Ru}(\text{phen})_3^{2+}$  (**B**). Absence of the molecular peaks at  $m/z$  570 and 642 for  $\text{Ru}(\text{bpy})_3^{2+}$  and  $\text{Ru}(\text{phen})_3^{2+}$ , respectively, indicates photolysis of these complex cations.

## FlexAnalysis script and macro for automatic data processing

A FlexAnalysis method script for an automatic finding of m/z 570.11 ([Ru(bpy)<sub>3</sub>]<sup>+</sup>) and 642.11 ([Ru(phen)<sub>3</sub>]<sup>+</sup>) peaks in the spectrum:

```
Option Explicit
Sub Main
    UndoAllProcessing()
    Dim dRange(1) As Double
        dRange(0) = 569.8
        dRange(1) = 570.4

        {dRange(0) = 566.8}
        {dRange(1) = 573.4}
        {for the "seven peaks" approach}

    Dim ResultSpec As Spectrum
    Set ResultSpec = Spectra(1).Process(faFindPeaks, dRange)

    Dim tRange(1) As Double
        tRange(0) = 641.8
        tRange(1) = 642.4

        { tRange(0) = 638.8}
        {tRange(1) = 645.8}
        {for the "seven peaks" approach}

    Dim aResultSpec As Spectrum
    Set aResultSpec = Spectra(1).Process(faFindPeaks, tRange)

    ResultSpec.Enabled = True
    aResultSpec.Enabled = True

    Save
End Sub
```

This script is based on Bruker Daltonik GmbH PMF.FAMSMETHOD.<sup>1</sup>

A FlexAnalysis macro that extracts the peak information (m/z and peak area) from the spectra and transfers it into an Excel sheet:

```
Attribute VB_Creatable = True
Attribute VB_Exposed = False
Attribute VB_GlobalNameSpace = False
Attribute VB_Name = "MassListToExcel"

'#Uses "FATools.obm"

Option Explicit
Option Base 1

Private aAnaSpec() As TAnaSpec
Private nSpectra%
Private Const sDelimiter$ = vbTab

Property Get MenuItem$
    MenuItem = "File/Export/Mass List to Excel"
End Property

Property Get EnableMenuItem As Boolean
    EnableMenuItem = Tools.GetSelectedAnaSpec(aAnaSpec) > 0
End Property
Sub Main
    Execute
End Sub

Sub Execute
    On Error GoTo Failed

    MassListToExcel

    Exit Sub

Failed:
    MsgBox Err.Description
End Sub

Private Sub MassListToExcel
    ' Transfer the mass list to Excel
    nSpectra = Tools.GetSelectedAnaSpec(aAnaSpec)
    If nSpectra = 0 Then
        Err.Raise 1, "No spectrum selected"
    End If

    ' Open Excel application
    Dim Excel As Object
```

```
Set Excel = OpenExcel
```

```
Dim i%  
For i = 1 To nSpectra
```

```
Excel.Sheets(1).Activate
```

```
Dim sName$  
sName = Replace(aAnaSpec(i).oAnalysis.Name, "\", "_")  
sName = Replace(sName, " ", "_")  
sName = Left(sName, 31)
```

```
Dim Paster$  
Paster = "A" + CStr(3*i-2) + ":" + "A" + CStr(3*i-2)
```

```
{Paster = "A" + CStr(15*i-14) + ":" + "A" + CStr(15*i-14)}  
{for the "seven peaks" approach}
```

```
CopyMassListToClipboard aAnaSpec(i).oAnalysis, aAnaSpec(i).oSpectrum
```

```
Excel.Range(Paster).Select  
Excel.Sheets(1).Paste
```

```
Next i
```

```
Clipboard ""  
End Sub
```

```
Private Function OpenExcel As Object  
Dim ExcelApp As Object  
On Error Resume Next  
Set ExcelApp = GetObject("Excel.Application")  
If ExcelApp = Null Then  
Set ExcelApp = CreateObject("Excel.Application")  
End If  
ExcelApp.Visible = True  
ExcelApp.Workbooks.Add  
Set OpenExcel = ExcelApp  
End Function
```

```
Private Sub CopyMassListToClipboard(oAnalysis As Analysis, oSpectrum As  
Spectrum)
```

```
Dim sName$  
sName = Replace(GetSpectrumName(oAnalysis, oSpectrum), "\1 1SRef Raw", "")  
Dim sCsv$  
sCsv = sName + vbTab  
  
sCsv = sCsv + "m/z" + vbTab + "Area" + vbCrLf
```



*On Error Resume Next*

*Dim oPeakList As MassList  
Set oPeakList = oSpectrum.MassList*

*Dim i%*

*For i = 1 To oPeakList.Count  
Dim oPeak As MassPeakInfo  
Dim sValue\$*

*Set oPeak = oPeakList(i)*

*sValue = ""  
sValue = Replace(CStr(oPeak.MassToChargeValue), ",", ".")  
sCsv = sCsv + sDelimiter + sValue + sDelimiter  
sValue = ""  
sValue = Replace(CStr(oPeak.Area), ",", ".")  
sCsv = sCsv + sValue + vbCrLf*

*Next*

*Clipboard sCsv*

*End Sub*

*Private Function GetSpectrumName(oAnalysis As Analysis, oSpectrum As  
Spectrum)*

*GetSpectrumName = oAnalysis.Name + " " + oSpectrum.Name*

*End Function*

This script is based on Bruker Daltonik GmbH MassListToExcel.obm.<sup>1</sup>

(1). Bruker Daltonik GmbH, *FlexAnalysis Scripting Manual, Version 3.0*, 2006.
